# Supplementary material for: Synthesis and characterisation of bulky guanidines and phosphaguanidines: precursors for low oxidation state metallacycles
Source: Royal Society of Chemistry journal article supplement (doi:10.1039/b809120j), 2008-10-09
Supplement: b809120j.pdf [file b809120j.pdf]

**Synthesis and Characterisation of Bulky Guanidines and Phosphaguanidines: Precursors for  
Low Oxidation State Metallacycles**

**Guoxia Jin, Cameron Jones,\* Peter C. Junk, Kai-Alexander Lippert, Richard P. Rose and  
Andreas Stasch**

**SUPPLEMENTARY MATERIAL**

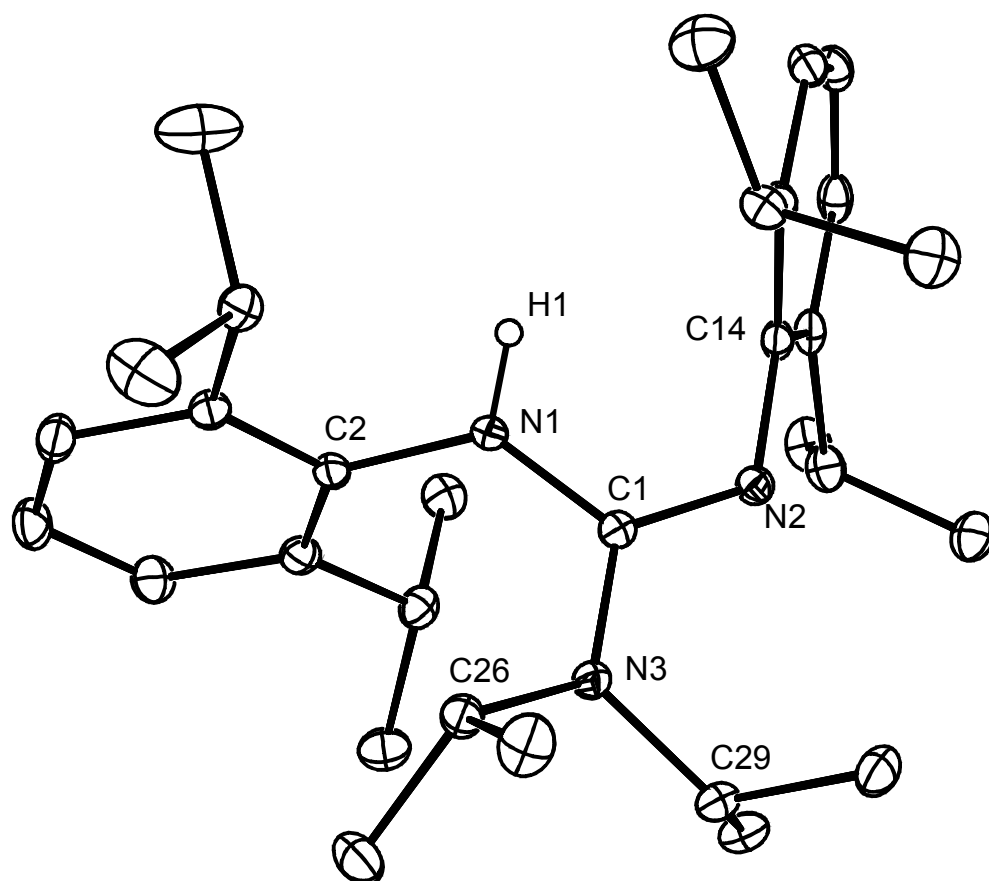

**Figure S1.** Molecular structure of PrisoH 2 (25% thermal ellipsoids are shown; hydrogen atoms, except H(1), omitted for sake of clarity).

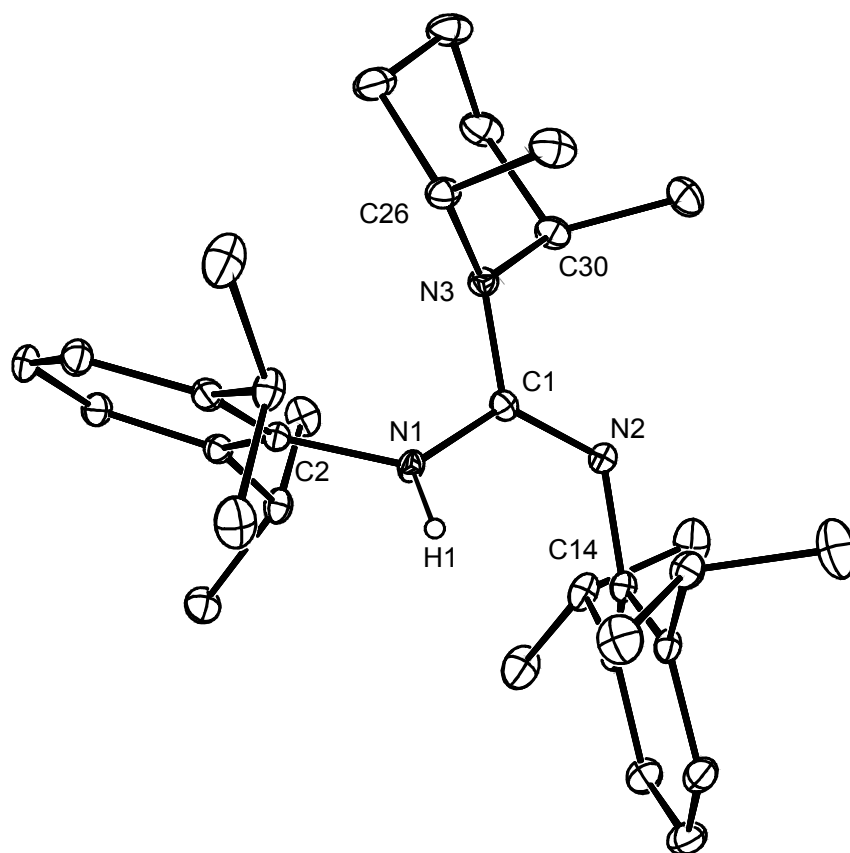

**Figure S2.** Molecular structure of PipisoH **3** (25% thermal ellipsoids are shown; hydrogen atoms, except H(1), omitted for sake of clarity).
